# Supplementary material for: Evolution of extensively drug-resistant Mycobacterium tuberculosis from a susceptible ancestor in a single patient
Source: PubMed Central journal article supplement (PMC4223161; doi:10.1186/s13059-014-0490-3), 2014-11-07
Supplement: 13059_2014_490_MOESM2_ESM.pdf [file 13059_2014_490_MOESM2_ESM.pdf]

**Supplementary tables and figures.**

**Table S1. Cluster of orthologous groups of significantly up- and downregulated genes in isolates SF4-SF6 relative to SF1. Significantly enriched categories are highlighted in bold.**

|                        | COG term                                                           | Specified genes (n) | Genome (n) | specified genes (%) | Genome (%) | p value | corrected p value |
|------------------------|--------------------------------------------------------------------|---------------------|------------|---------------------|------------|---------|-------------------|
| <b>1&gt;4<br/>down</b> | Secondary metabolites biosynthesis transport and catabolism        | 2                   | 240        | 50                  | 6          | 0.019   | 0.057             |
|                        | Signal transduction mechanisms                                     | 1                   | 103        | 25                  | 2.58       | 0.095   | 0.286             |
|                        | General function prediction only                                   | 1                   | 441        | 25                  | 11.03      | 0.311   | 0.933             |
| <b>1&gt;4<br/>up</b>   | Cell motility                                                      | 1                   | 11         | 16.67               | 0.28       | 0.016   | 0.081             |
|                        | Energy production and conversion                                   | 2                   | 218        | 33.33               | 5.45       | 0.036   | 0.178             |
|                        | Inorganic ion transport and metabolism                             | 1                   | 125        | 16.67               | 3.13       | 0.16    | 0.801             |
| <b>1&gt;5<br/>down</b> | <b>Secondary metabolites biosynthesis transport and catabolism</b> | 4                   | 240        | 36.36               | 6          | 0.003   | <b>0.019</b>      |
|                        | Signal transduction mechanisms                                     | 2                   | 103        | 18.18               | 2.58       | 0.029   | 0.201             |
|                        | Nucleotide transport and metabolism                                | 1                   | 64         | 9.09                | 1.6        | 0.15    | 1.051             |
| <b>1&gt;5<br/>up</b>   | Carbohydrate transport and metabolism                              | 2                   | 114        | 10.53               | 2.85       | 0.085   | 0.934             |
|                        | Translation ribosomal structure and biogenesis                     | 2                   | 121        | 10.53               | 3.03       | 0.093   | 1.021             |
|                        | Inorganic ion transport and metabolism                             | 2                   | 125        | 10.53               | 3.13       | 0.097   | 1.071             |
| <b>1&gt;6<br/>down</b> | <b>Secondary metabolites biosynthesis transport and catabolism</b> | 6                   | 240        | 26.09               | 6          | 0.002   | <b>0.016</b>      |
|                        | Signal transduction mechanisms                                     | 3                   | 103        | 13.04               | 2.58       | 0.018   | 0.177             |
|                        | Lipid transport and metabolism                                     | 3                   | 263        | 13.04               | 6.58       | 0.129   | 1.294             |
| <b>1&gt;6<br/>up</b>   | Cell wall/membrane/envelope biogenesis                             | 4                   | 108        | 10                  | 2.7        | 0.018   | 0.231             |
|                        | General function prediction only                                   | 8                   | 441        | 20                  | 11.03      | 0.04    | 0.516             |
|                        | Secondary metabolites biosynthesis transport and catabolism        | 5                   | 240        | 12.5                | 6          | 0.058   | 0.76              |

**Table S2. Oligonucleotides listed by application**

| Primer      | Sequence                  | Application      |
|-------------|---------------------------|------------------|
| gyrB_F      | GGCACGAGAGTTGGTGCGGCG     |                  |
| gyrB_S NPR1 | CGGACTTGCGCGGATCCGTGA     |                  |
| gyrB_S NPR2 | CCGTGATGATCGCCTGAACTTCGT  |                  |
| gyrB_W TR1  | CGGACTTGCGCGGATCCGTGG     |                  |
| gyrB_W TR2  | CCGTGATGATCGCCTGAACTTCGG  |                  |
| embB_F1     | GTCGCGCAACCGGATGGCGTTC    | SNP verification |
| embB_S NPR1 | AGCTGGAGACATAACCACCAGCCGA |                  |
| embB_W TR1  | AGCTGGAGACATAACCACCAGCCGT |                  |
| embB_F2     | CTGCTGGACTGGGCGGTTCGGT    |                  |
| embB_S NPR2 | GCCGTCTTCCCACGTGTCGGTGTT  |                  |
| embB_W TR2  | GCCGTCTTCCCACGTGTCGGTGTC  |                  |
| iniBF       | CAAATCTCATCGGTGGCGGCCAATG |                  |
| iniBR       | CGCAATCCGCTCATGGGGTCG     | qPCR             |
| rpoBF       | GCCTGCGTACGGTCGGCGA       |                  |
| rpoBR       | GCCTCCACGTCCTGGGTGGTC     |                  |

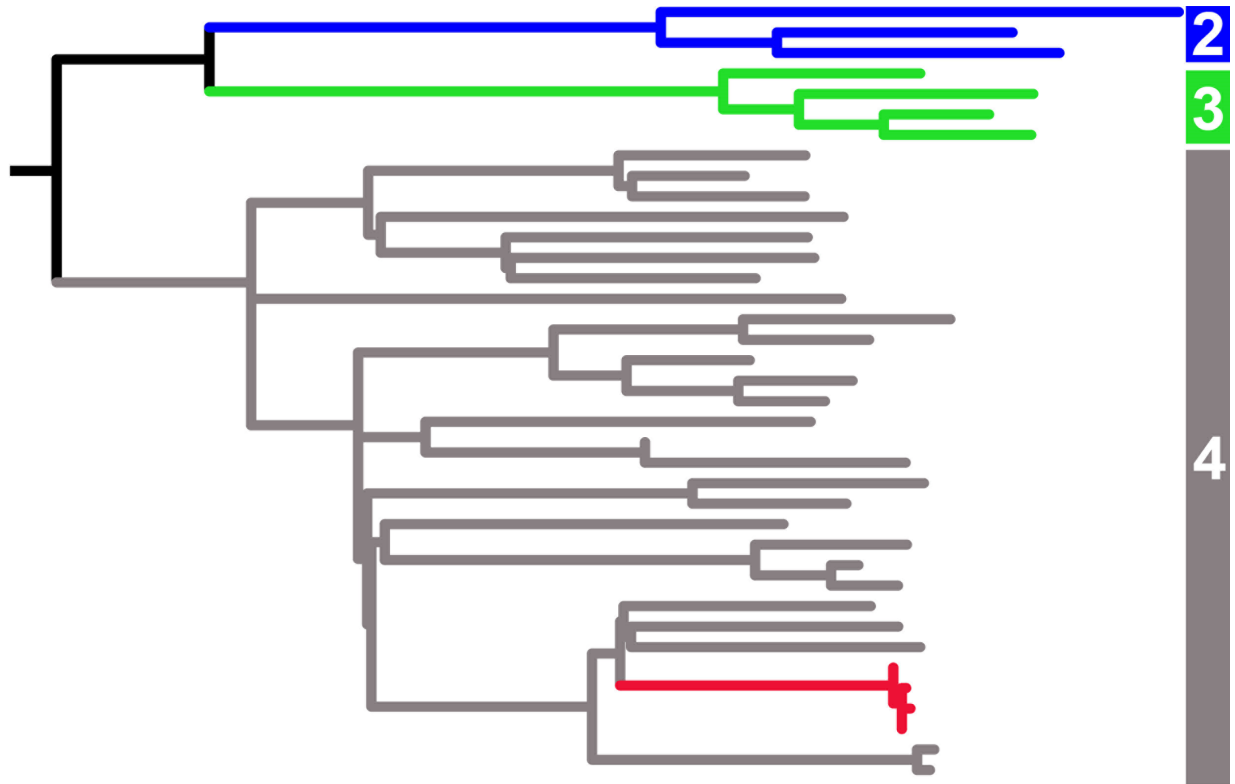

**Figure S1.** Phylogenetic placement of patient isolates. Maximum likelihood tree based on 2801 synonymous SNPs. Numbers refer to the modern *M. tuberculosis* lineages 2,3 and 4.

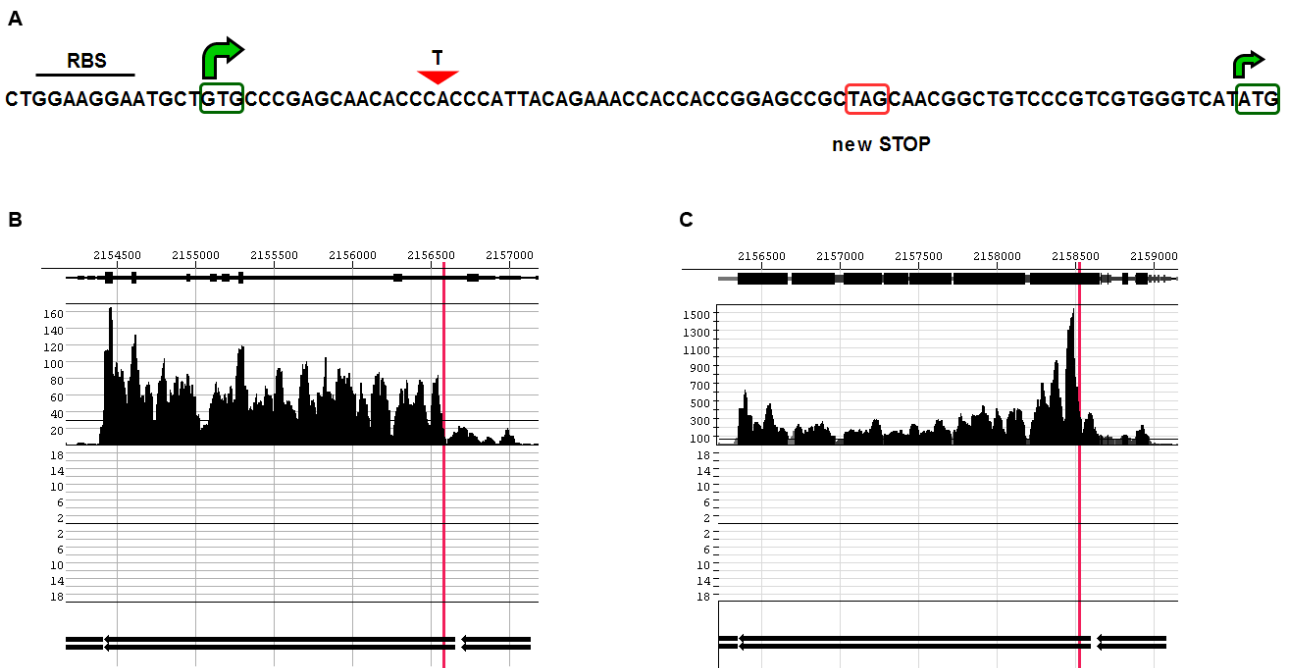

**Figure S2. Expression of *katG*.** (A) Schematic overview of *katG* features. Ribosomal binding site (RBS) and start codon (GTG) are indicated. The insertion identified in isolates SF2-SF9 is indicated by a red triangle. The insertion results in a premature STOP codon which is followed by an alternative ATG start codon. (B) RNA-seq reads from isolate SF1 aligned to *katG*. (C) RNA-seq reads from isolates SF4-SF6 aligned to *katG*.
